# Supplementary material for: Genome-wide identification and characterization of TCP transcription factor genes in upland cotton (Gossypium hirsutum)
Source: PubMed Central journal article supplement (PMC5579058; doi:10.1038/s41598-017-10609-2), 2017-08-31
Supplement: 41598_2017_10609_MOESM1_ESM.pdf [file 41598_2017_10609_MOESM1_ESM.pdf]

1 **Genome-wide identification and characterization of TCP**  
2 **transcription factor genes in upland cotton (*Gossypium hirsutum*)**

3

4 Wen Li<sup>1,+</sup>, Deng-Di Li<sup>1,+</sup>, Li-Hong Han<sup>1,+</sup>, Miao Tao<sup>1</sup>, Qian-Qian Hu<sup>1</sup>, Wen-Ying Wu<sup>1</sup>,  
5 Jing-Bo Zhang<sup>1</sup>, Xue-Bao Li<sup>1,\*</sup>, Geng-Qing Huang<sup>1,\*</sup>

6

7 Supplementary Table 1. Conserved motifs and motif order of GhTCFs.

| Subgroup   | name       | motif order                   | E value            | Class I or II      |
|------------|------------|-------------------------------|--------------------|--------------------|
| Group E    | GhTCP11-A  | 1/2/12                        | 3.8e-47            | Class I (PCF-like) |
|            | GhTCP11-D  | 1/2/12                        | 2.5e-48            |                    |
| Group B    | GhTCP8-A   | 16/1/2/11/9/19/14/18/6        | 1.0e-130           |                    |
|            | GhTCP8-D   | 1/2/11/9/19/14/18/6           | 7.3e-131           |                    |
|            | GhTCP22-A  | 16/1/2/11/9/19/14/18/6/11     | 5.1e-203           |                    |
|            | GhTCP22-D  | 16/1/2/11/9/19/14/18/6/11     | 3.4e-206           |                    |
|            | GhTCP23-A  | 11/1/2/11/19/14/18/6/11       | 1.4e-99            |                    |
|            | GhTCP23-D  | 11/1/2/11/19/14/18/6/11       | 1.3e-102           |                    |
| Group C    | GhTCP7a-A  | 1/2/9/14/12/6                 | 1.0e-82            |                    |
|            | GhTCP7a-D  | 1/2/9/14/12/6                 | 1.4e-82            |                    |
|            | GhTCP7b-A  | 18/1/2/9/14/12/6              | 4.7e-82            |                    |
|            | GhTCP7b-D  | 18/1/2/9/14/12/6              | 2.0e-82            |                    |
|            | GhTCP21-A  | 18/1/2/9/14/12/6              | 5.9e-76            |                    |
|            | GhTCP21-D  | 18/1/2/9/14/12/6              | 1.0e-76            |                    |
| Group A    | GhTCP14a-A | 11/9/8/1/2/13/12/10/14/3/6    | 9.3e-195           |                    |
|            | GhTCP14a-D | 11/9/8/1/2/13/12/10/14/3/6    | 9.3e-195           |                    |
|            | GhTCP14b-A | 11/9/8/1/2/13/12/10/14/3/6    | 1.4e-207           |                    |
|            | GhTCP14b-D | 9/8/1/2/13/12/10/14/3/6       | 8.1e-201           |                    |
|            | GhTCP14c-A | 11/9/8/1/2/13/12/10/14/3/6    | 1.2e-201           |                    |
|            | GhTCP14c-D | 9/8/1/2/13/12/10/14/3/6       | 4.1e-199           |                    |
|            | GhTCP15a-A | 9/8/1/2/13/12/10/3/6          | 4.9e-185           |                    |
|            | GhTCP15a-D | 9/8/1/2/13/12/10/3/6          | 4.9e-185           |                    |
|            | GhTCP15b-A | 9/8/1/2/13/18/12/10/14/3/6    | 3.6e-207           |                    |
|            | GhTCP15b-D | 9/8/1/2/13/18/12/10/14/3/6/11 | 4.8e-212           |                    |
|            | GhTCP15c-A | 9/8/1/2/13/18/12/10/14/3/6    | 5.1e-206           |                    |
|            | GhTCP15c-D | 9/8/1/2/13/18/12/10/14/3/6    | 2.3e-209           |                    |
|            | Group F    | GhTCP6a-A                     | 18/8/1/2/12/4/5/11 | 3.4e-192           |
|            |            | GhTCP6a-D                     | 18/8/1/2/12/4/5/11 | 1.2e-191           |
| GhTCP6b-A  |            | 18/8/1/2/12/4/5               | 2.3e-185           |                    |
| GhTCP6b-D  |            | 18/8/1/2/12/4/5               | 3.4e-187           |                    |
| GhTCP6c-A  |            | 18/8/1/2/12/4/5               | 7.9e-181           |                    |
| GhTCP6c-D  |            | 18/8/1/2/12/4/5               | 6.3e-185           |                    |
| GhTCP20a-A |            | 8/1/2/12/4/5/11               | 7.9e-176           |                    |
| GhTCP20a-D |            | 18/8/1/2/12/4/5/11            | 6.2e-183           |                    |
| GhTCP20b-A |            | 18/8/1/2/12/10/5              | 9.3e-108           |                    |
| GhTCP20b-D |            | 18/8/1/2/12/10/5              | 5.5e-112           |                    |
| Group D    | GhTCP9a-A  | 8/1/2/18/14/12/9              | 2.4e-78            |                    |
|            | GhTCP9a-D  | 8/1/2/18/14/12/9              | 1.6e-79            |                    |
|            | GhTCP9b-A  | 1/2/18/14/14/19/9             | 9.2e-66            |                    |
|            | GhTCP9b-D  | 1/2/18/14/14/19/9             | 6.4e-66            |                    |
|            | GhTCP19-A  | 1/2/18/14/12/9                | 1.8e-63            |                    |
|            | GhTCP19-D  | 1/2/18/12/9                   | 6.8e-64            |                    |
| Group G    | GhTCP16-A  | 1/9                           | 1.2e-35            |                    |
|            | GhTCP16-D  | 1/9                           | 1.2e-35            |                    |
|            | GhTCP25-A  | 18/1/20/12/5                  | 1.1e-62            |                    |
|            | GhTCP25-D  | 18/1/20/12/5                  | 2.9e-62            |                    |

|           |            |                         |           |                            |
|-----------|------------|-------------------------|-----------|----------------------------|
| Group I   | GhTCP3-A   | 7/1/17/9/11/11/15/11/12 | 3.7e-134  | Class II (CIN-like)        |
|           | GhTCP3-D   | 7/1/17/9/11/11/15/11/12 | 9.8e-131  |                            |
|           | GhTCP10-A  | 7/1/17/9/11/11/15/11/12 | 5.3e-128  |                            |
|           | GhTCP10-D  | 7/1/17/9/11/11/15/11/12 | 1.3e-124  |                            |
|           | GhTCP4-A   | 7/1/17/9/11/15/11/12    | 2.7e-133  |                            |
| Group K   | GhTCP4-D   | 7/1/17/9/11/15/11/12    | 2.1e-133  |                            |
|           | GhTCP5-A   | 7/1/9/17/12             | 3.7e-56   |                            |
|           | GhTCP5-D   | 7/1/9/17/12             | 9.3e-56   |                            |
|           | GhTCP17-A  | 12/7/1/11/17            | 7.6e-50   |                            |
|           | GhTCP17-D  | 12/7/1/11/17            | 1.6e-50   |                            |
|           | GhTCP13a-A | 12/7/1/10               | 5.4e-50   |                            |
|           | GhTCP13a-D | 12/7/1/10               | 2.2e-52   |                            |
|           | GhTCP13b-A | 12/7/1                  | 9.7e-39   |                            |
|           | GhTCP13b-D | 12/7/1                  | 9.9e-38   |                            |
|           | Group J    | GhTCP2-A                | 7/1/20/14 |                            |
| GhTCP2-D  |            | 7/1/20/14               | 1.6e-50   |                            |
| GhTCP24-A |            | 7/1/20/14/11            | 2.4e-56   |                            |
| GhTCP24-D |            | 7/1/20/14/11            | 2.4e-56   |                            |
| Group H   | GhTCP1-A   | 11/1/20                 | 7.9e-44   | Class II<br>(CYC/TB1-like) |
|           | GhTCP1-D   | 11/1/20                 | 2.7e-44   |                            |
|           | GhTCP12-A  | 18/8/7/1/20             | 4.6e-41   |                            |
|           | GhTCP12-D  | 18/8/7/1/20             | 2.0e-41   |                            |
|           | GhTCP18a-A | 10/1/9/20/11            | 7.6e-45   |                            |
|           | GhTCP18a-D | 1/9/20                  | 2.3e-43   |                            |
|           | GhTCP18b-A | 1/11/12/1/19/20/11/13   | 5.6e-58   |                            |
|           | GhTCP18b-D | 9/11/12/1/20/11         | 4.3e-54   |                            |

9 Supplementary Table 2. The RPKM (reads per kb per million reads) values denoting the  
 10 expression levels of *TCP* genes.

| Gene name  | Gene symbol | -3ovule  | 0-ovule  | 3-ovule  | 5dpa     | 10dpa    | 20dpa    | 25dpa    |
|------------|-------------|----------|----------|----------|----------|----------|----------|----------|
| GhTCP1-A   | Gh_A07G1572 | 0        | 0        | 0        | 0        | 0        | 0        | 0.058043 |
| GhTCP2-A   | Gh_A05G1236 | 43.128   | 39.1682  | 38.97949 | 34.831   | 24.0063  | 28.218   | 11.5611  |
| GhTCP2-D   | Gh_D05G3838 | 38.2179  | 31.6293  | 27.87133 | 21.2901  | 15.3152  | 24.3422  | 10.3497  |
| GhTCP3-A   | Gh_A01G0414 | 3.793684 | 4.134738 | 5.055131 | 2.952592 | 2.295177 | 1.255306 | 13.5947  |
| GhTCP3-D   | Gh_D01G0419 | 3.718353 | 5.239975 | 3.970553 | 2.521547 | 1.675268 | 4.493948 | 16.8245  |
| GhTCP4-A   | Gh_A04G0316 | 2.911143 | 0.860544 | 3.658502 | 4.807865 | 6.048547 | 3.853258 | 6.051921 |
| GhTCP4-D   | Gh_D05G3332 | 2.144128 | 1.185044 | 2.18743  | 1.422124 | 2.374428 | 5.526826 | 8.007604 |
| GhTCP5-A   | Gh_A12G1657 | 0.12121  | 0        | 0.023253 | 0        | 0.027479 | 0        | 1.332641 |
| GhTCP5-D   | Gh_D12G1814 | 0.898554 | 0.02851  | 0.359589 | 0        | 0.081935 | 0.75718  | 1.923578 |
| GhTCP6a-A  | Gh_A10G0634 | 1.092935 | 1.057684 | 2.195825 | 1.017906 | 1.426371 | 4.477338 | 2.761232 |
| GhTCP6a-D  | Gh_D10G0762 | 1.542673 | 0.51461  | 1.735965 | 0.746674 | 1.020341 | 2.682712 | 2.006759 |
| GhTCP6b-A  | Gh_A05G2936 | 0.90832  | 1.6785   | 1.346253 | 1.32003  | 0.83765  | 24.8497  | 13.3814  |
| GhTCP6b-D  | Gh_D04G0721 | 2.89942  | 3.02401  | 2.940257 | 1.27074  | 0.86977  | 40.7474  | 21.0792  |
| GhTCP6c-A  | Gh_A09G2496 | 0.596217 | 0.29071  | 0.264979 | 0.323893 | 0.029961 | 1.038274 | 0.792578 |
| GhTCP6c-D  | Gh_D09G0381 | 0.248791 | 0.361026 | 0.514521 | 0.51553  | 0.382072 | 1.610524 | 0.862666 |
| GhTCP7a-A  | Gh_A03G1464 | 4.119916 | 5.382942 | 10.66243 | 13.0509  | 3.944947 | 2.565243 | 4.469166 |
| GhTCP7a-D  | Gh_D02G1925 | 4.31742  | 6.696104 | 10.86611 | 18.3383  | 8.439013 | 2.190774 | 3.890616 |
| GhTCP7b-A  | Gh_A13G0528 | 9.595801 | 7.413611 | 10.68479 | 6.562331 | 7.867909 | 1.891182 | 3.83915  |
| GhTCP7b-D  | Gh_D13G0602 | 12.12343 | 8.324929 | 11.82406 | 7.800414 | 6.28633  | 1.395857 | 2.821856 |
| GhTCP8-A   | Gh_A04G1120 | 8.93018  | 3.92743  | 4.634318 | 3.11299  | 1.34818  | 5.2084   | 4.10954  |
| GhTCP8-D   | Gh_D04G1732 | 9.87358  | 5.52163  | 5.85813  | 3.04966  | 1.55976  | 6.91149  | 4.39986  |
| GhTCP9a-A  | Gh_A11G0759 | 12.17658 | 4.72164  | 7.297966 | 5.002134 | 3.354901 | 4.691452 | 6.603302 |
| GhTCP9a-D  | Gh_D11G0887 | 11.33406 | 5.819478 | 6.712125 | 3.527974 | 2.438645 | 3.954006 | 4.643692 |
| GhTCP9b-A  | Gh_A12G2051 | 38.1998  | 12.8067  | 14.15322 | 4.520842 | 2.31353  | 0.513792 | 1.025389 |
| GhTCP9b-D  | Gh_D12G2229 | 22.0801  | 18.1542  | 13.06758 | 5.74622  | 4.009062 | 0.550683 | 0.469307 |
| GhTCP10-A  | Gh_A13G1272 | 10.633   | 9.87016  | 9.646767 | 9.55502  | 8.91926  | 9.21566  | 12.3753  |
| GhTCP10-D  | Gh_D13G1576 | 9.49409  | 8.5764   | 9.267314 | 9.58347  | 9.66616  | 10.8616  | 12.0864  |
| GhTCP11-A  | Gh_A09G1389 | 1.07687  | 0.959679 | 3.096471 | 1.797841 | 1.611111 | 7.681179 | 4.844826 |
| GhTCP11-D  | Gh_D09G1394 | 1.756258 | 1.166791 | 1.192285 | 1.006552 | 2.253806 | 4.8011   | 4.903123 |
| GhTCP12-A  | Gh_A12G1561 | 0.154037 | 0        | 0.182439 | 0.049878 | 0        | 0.027485 | 0.099992 |
| GhTCP12-D  | Gh_D12G1689 | 0.054919 | 0        | 0.013568 | 0.024898 | 0        | 0.027485 | 0.133322 |
| GhTCP13a-A | Gh_A05G3219 | 2.304494 | 1.878745 | 1.674126 | 0.409191 | 1.226476 | 5.375785 | 3.454591 |
| GhTCP13a-D | Gh_D04G0387 | 4.002478 | 2.956107 | 3.021519 | 1.045731 | 2.590998 | 6.718204 | 6.34285  |
| GhTCP13b-A | Gh_A09G0084 | 9.204154 | 6.644285 | 6.950844 | 6.14395  | 1.981187 | 4.46023  | 4.077899 |
| GhTCP14a-A | Gh_A11G0279 | 8.64517  | 7.04354  | 19.34541 | 28.3725  | 37.5771  | 0.69167  | 1.39015  |
| GhTCP14a-D | Gh_D11G0333 | 10.1867  | 6.74463  | 19.76992 | 24.0844  | 31.0267  | 0.53488  | 1.14207  |
| GhTCP14b-A | Gh_A07G0574 | 8.45262  | 5.64745  | 4.567338 | 3.42401  | 2.22818  | 0.64115  | 0.68934  |
| GhTCP14b-D | Gh_D07G0639 | 17.334   | 16.5035  | 11.14922 | 4.28985  | 1.95995  | 2.44597  | 1.46268  |
| GhTCP14c-A | Gh_A12G1603 | 5.60733  | 1.74658  | 1.219029 | 0.74948  | 0.03603  | 0.2373   | 0.08019  |
| GhTCP14c-D | Gh_D12G1742 | 6.78435  | 2.04705  | 2.780272 | 1.37901  | 0.05957  | 0.24085  | 0.18756  |
| GhTCP15a-A | Gh_A12G1522 | 0.17479  | 1.42741  | 1.004499 | 1.6413   | 22.5323  | 0        | 0.40808  |

|            |             |          |          |          |          |          |          |          |
|------------|-------------|----------|----------|----------|----------|----------|----------|----------|
| GhTCP15a-D | Gh_D12G1644 | 0.37823  | 0.88895  | 1.166681 | 4.36272  | 31.3828  | 0        | 0.90963  |
| GhTCP15b-A | Gh_A13G0648 | 2.14995  | 3.96098  | 7.045882 | 2.1475   | 9.56593  | 0.23199  | 0.42554  |
| GhTCP15b-D | Gh_D13G2530 | 4.14437  | 4.99955  | 13.83429 | 4.33449  | 11.7877  | 4.00236  | 3.16691  |
| GhTCP15c-A | Gh_A13G0647 | 6.76533  | 15.2444  | 10.92444 | 8.12662  | 18.4899  | 6.1579   | 2.60161  |
| GhTCP15c-D | Gh_D13G2529 | 3.76945  | 8.28306  | 21.74904 | 2.13316  | 9.61785  | 0.59557  | 1.299    |
| GhTCP16-A  | Gh_A13G2021 | 1.926086 | 2.25553  | 1.303538 | 0.523737 | 0.633924 | 1.214918 | 0.632378 |
| GhTCP16-D  | Gh_D13G2419 | 0.91579  | 1.722709 | 0.954937 | 0.364914 | 0.180993 | 0.420229 | 0.459988 |
| GhTCP17-A  | Gh_A07G0613 | 0        | 0        | 0        | 0        | 0        | 0.077514 | 0.141879 |
| GhTCP17-D  | Gh_D07G0680 | 0        | 0        | 0        | 0        | 0        | 0.077514 | 0.020889 |
| GhTCP18a-A | Gh_A11G0057 | 0        | 0        | 0        | 0        | 0        | 0        | 0        |
| GhTCP18a-D | Gh_D11G0061 | 0        | 0        | 0        | 0        | 0        | 0        | 0        |
| GhTCP18b-A | Gh_A12G2405 | 0.045219 | 0.588231 | 0.108298 | 0.198385 | 0.09689  | 0        | 0.045467 |
| GhTCP18b-D | Gh_D12G2641 | 0        | 0.014592 | 0        | 0        | 0        | 0        | 0        |
| GhTCP19a-A | Gh_A09G1605 | 10.3525  | 13.894   | 9.2614   | 1.56312  | 2.00991  | 9.98723  | 7.80271  |
| GhTCP19a-D | Gh_D09G1703 | 11.3708  | 9.36467  | 9.515641 | 1.4661   | 1.60675  | 6.75467  | 6.98464  |
| GhTCP19b-A | Gh_A08G1602 | 1.173022 | 0.826524 | 0.70926  | 0.22393  | 0.352036 | 0.436173 | 0.357753 |
| GhTCP19b-D | Gh_D08G1913 | 1.111985 | 0.656406 | 4.163317 | 0.252796 | 0.242919 | 0.537478 | 0.296383 |
| GhTCP20a-A | Gh_A07G2121 | 6.263062 | 4.025104 | 0.734858 | 1.492104 | 0.667754 | 2.173096 | 3.078708 |
| GhTCP20a-D | Gh_D07G2330 | 2.192435 | 3.880327 | 0.955892 | 1.622325 | 0.840964 | 3.545393 | 3.756142 |
| GhTCP20b-A | Gh_A12G1302 | 7.46456  | 4.23114  | 4.475074 | 27.2127  | 38.5913  | 19.0614  | 13.2008  |
| GhTCP20b-D | Gh_D12G1425 | 6.11779  | 5.25935  | 2.813079 | 11.1875  | 16.479   | 6.61042  | 5.37929  |
| GhTCP21-A  | Gh_A12G1214 | 23.0958  | 12.6982  | 11.52413 | 12.5544  | 14.6172  | 3.73729  | 6.56445  |
| GhTCP21-D  | Gh_D12G1337 | 23.0359  | 13.0287  | 6.654194 | 17.7348  | 33.6284  | 3.14037  | 6.75964  |
| GhTCP22-A  | Gh_A01G1534 | 0.716273 | 2.570905 | 4.777318 | 11.73482 | 14.83804 | 4.118777 | 2.494799 |
| GhTCP22-D  | Gh_D01G1783 | 1.714007 | 1.13131  | 1.668551 | 5.328265 | 14.22278 | 0.368229 | 0.374377 |
| GhTCP23-A  | Gh_A05G2343 | 48.9062  | 37.4553  | 9.064555 | 22.04    | 15.6365  | 16.506   | 13.8017  |
| GhTCP23-D  | Gh_D05G2610 | 5.764909 | 5.616406 | 3.47111  | 1.732839 | 1.09635  | 3.167462 | 1.337021 |
| GhTCP24-A  | Gh_A10G0394 | 2.774961 | 2.571037 | 3.232758 | 0.475033 | 1.329804 | 0.330611 | 0.089447 |
| GhTCP25-D  | Gh_D04G0925 | 2.453037 | 0.959975 | 3.27916  | 2.000638 | 1.077513 | 1.096347 | 0.667987 |
| GhTCP25-A  | Gh_A04G0489 | 5.559862 | 5.486126 | 0.680305 | 2.723046 | 12.3825  | 2.415755 | 2.801447 |

11 Supplementary Table 3. Primers used in this study.

| Primer name     | Sequence 5' -3'         | purpose |
|-----------------|-------------------------|---------|
| GhTCP1 qRT-up   | TCGAGGAATCTCTAGTGATCAG  | qRT-PCR |
| GhTCP1 qRT-dn   | CCATACAGTTGAACTCCTGTTG  | qRT-PCR |
| GhTCP2 qRT-up   | GATACCACCAATTTACTGTGTCG | qRT-PCR |
| GhTCP2 qRT-dn   | GGTGGTGATCCCTCTATAGAAG  | qRT-PCR |
| GhTCP3 qRT-up   | GTTCGTGCTTGGATAGACCAG   | qRT-PCR |
| GhTCP3 qRT-dn   | GCTTATTGGCAATGCTGTCTGTG | qRT-PCR |
| GhTCP4 qRT-up   | GCAACAGTCATTGCCACTGACT  | qRT-PCR |
| GhTCP4 qRT-dn   | CTCTTGGCCCTGAATTCGTGAC  | qRT-PCR |
| GhTCP5 qRT-up   | TGTCTCAGTTTGGAAACCATG   | qRT-PCR |
| GhTCP5 qRT-dn   | GTGTATGAGTGAGGCCAGCGT   | qRT-PCR |
| GhTCP6a qRT-up  | GCAGTGAAGGTTCTAATTATCTT | qRT-PCR |
| GhTCP6a qRT-dn  | TTGCTGTTGTTGATGCACTCTC  | qRT-PCR |
| GhTCP6b qRT-up  | GCAGTGATAGTTCCAATTATCTG | qRT-PCR |
| GhTCP6b qRT-dn  | CTGATGTTGGGGTTGCATCCGA  | qRT-PCR |
| GhTCP6c qRT-up  | GCACTGAAAGTCCATTATCTG   | qRT-PCR |
| GhTCP6c qRT-dn  | CTGTTGCTGGAGCACCCTAGC   | qRT-PCR |
| GhTCP7a qRT-up  | GCCAGACTTTGGTCAATTGTG   | qRT-PCR |
| GhTCP7a qRT-dn  | GACAACGAGGCTAACAAGTTTAG | qRT-PCR |
| GhTCP7b qRT-up  | GGCTCAGCAACCAGCTGCAGC   | qRT-PCR |
| GhTCP7b qRT-dn  | TCAACGAGGGTCATCGTCTCTT  | qRT-PCR |
| GhTCP8 qRT-up   | CTAGAGTCCCAAGGTGGTAGAG  | qRT-PCR |
| GhTCP8 qRT-dn   | GTACCTTGTTGTTGATGATGCTC | qRT-PCR |
| GhTCP9a qRT-up  | TCACATTCCCAGCCACAGCTAC  | qRT-PCR |
| GhTCP9a qRT-dn  | CTCTGAGCATCTGAGTCGTTGT  | qRT-PCR |
| GhTCP9b qRT-up  | CTCAAGCTGTGGTGTGCGACGG  | qRT-PCR |
| GhTCP9b qRT-dn  | GACCCATCAACTGCAACTCTTG  | qRT-PCR |
| GhTCP10 qRT-up  | TCAGAGGGGACCCCTTCAGTC   | qRT-PCR |
| GhTCP10 qRT-dn  | GAAGCAGAGGACAGCTTATTTG  | qRT-PCR |
| GhTCP11 qRT-up  | AGTTGCCGGCTGGACTTGTGC   | qRT-PCR |
| GhTCP11 qRT-dn  | GACCTAGGTAGTGGCTGCTCG   | qRT-PCR |
| GhTCP12 qRT-up  | TCATGACGGACCCTAATGAGC   | qRT-PCR |
| GhTCP12 qRT-dn  | CGTGGTAATCTGAATGCAAGCC  | qRT-PCR |
| GhTCP13a qRT-up | GACTGAAGAAGTACACAATTC   | qRT-PCR |
| GhTCP13a qRT-dn | ACCAGGCTGACTTCCATTGATG  | qRT-PCR |
| GhTCP13b qRT-up | TCAACGTTGTGGCAGCACCAT   | qRT-PCR |
| GhTCP13b qRT-dn | GAGGCATCAATTGGAAGGGTC   | qRT-PCR |
| GhTCP14a qRT-up | GGAACTATGTCTAGTGGGTTGC  | qRT-PCR |
| GhTCP14a qRT-dn | CGTGGTGTGAATGTGAGCCAC   | qRT-PCR |
| GhTCP14b qRT-up | CATGAATTTTCCAGCTCCGATG  | qRT-PCR |
| GhTCP14b qRT-dn | GACTAGTTGCATCATGTCTGGTT | qRT-PCR |
| GhTCP14c qRT-up | TCAGTTACTAACAGTGCTTTGT  | qRT-PCR |
| GhTCP14c qRT-dn | GACTAGTTGTATCATGTCTGATC | qRT-PCR |
| GhTCP15a qRT-up | TACCACGTCTAGTGGGGTGCAT  | qRT-PCR |
| GhTCP15a qRT-dn | GCTACTTGAATCATGCCTATGT  | qRT-PCR |
| GhTCP15b qRT-up | CGGCAACCAAGTCATCAGTG    | qRT-PCR |
| GhTCP15b qRT-dn | GTCTAGTGACGCCAGCATACTT  | qRT-PCR |
| GhTCP15c qRT-up | TGGCAACCAAGTTATCAGTGG   | qRT-PCR |
| GhTCP15c qRT-dn | ATTTAGTGACGCCAGCATGCTT  | qRT-PCR |
| GhTCP16 qRT-up  | CAACAACAACAGCACCAACACT  | qRT-PCR |
| GhTCP16 qRT-dn  | ATGATTTGCAGCTGCTGCCAC   | qRT-PCR |

|                 |                                   |         |
|-----------------|-----------------------------------|---------|
| GhTCP17 qRT-up  | GTTCAACACTGGGACTAATTC             | qRT-PCR |
| GhTCP17 qRT-dn  | CTGATCACCTGCAGCATCTTG             | qRT-PCR |
| GhTCP18a qRT-up | GTCCTCTCGCAAGGGATATGAG            | qRT-PCR |
| GhTCP18a qRT-dn | TCCAGTGTTTTGCAGACAATTC            | qRT-PCR |
| GhTCP18b qRT-up | CCAAACTCAGTTCATGGTGGTC            | qRT-PCR |
| GhTCP18b qRT-dn | CCAAAGGGCAGAAAGCCAGTG             | qRT-PCR |
| GhTCP19a qRT-up | GCTGCACCTGGTTCAAACCAG             | qRT-PCR |
| GhTCP19a qRT-dn | CTAAGCATCTGCGTAGTACTAT            | qRT-PCR |
| GhTCP19b qRT-up | GCAAGACCCATATCTTCAATC             | qRT-PCR |
| GhTCP19b qRT-dn | CTTGCATCTGCAGCCTGATGA             | qRT-PCR |
| GhTCP20a qRT-up | GCACTGAAAGTTCAAATTATCTG           | qRT-PCR |
| GhTCP20a qRT-dn | GTGCTGGTGCTGGTGCTGGAAC            | qRT-PCR |
| GhTCP20b qRT-up | TGTGAGTTTTTCGTCGCTGCTC            | qRT-PCR |
| GhTCP20b qRT-dn | CTTATCAGCAACAATCTGCTGC            | qRT-PCR |
| GhTCP21 qRT-up  | G TTCAGCAACAGCAAGCGATG            | qRT-PCR |
| GhTCP21 qRT-dn  | CTCTTCCACATCCACACACATC            | qRT-PCR |
| GhTCP22 qRT-up  | TGAATTC AAGGTGGTAGAGCT            | qRT-PCR |
| GhTCP22 qRT-dn  | TCTCCACTGTCTGTACCTTGAG            | qRT-PCR |
| GhTCP23 qRT-up  | GTGCCAGAAGCCCAGATGTG              | qRT-PCR |
| GhTCP23 qRT-dn  | TTCATGATGATGCTGCTGTTC             | qRT-PCR |
| GhTCP24 qRT-up  | TGACTACAACCTCAATTCAC              | qRT-PCR |
| GhTCP24 qRT-dn  | GTCTGAGCTCCTGTTCCATC              | qRT-PCR |
| GhTCP25 qRT-up  | GCATAGACGGAGATCAAACAG             | qRT-PCR |
| GhTCP25 qRT-dn  | TTGCAGACCAACCAACAGAATC            | qRT-PCR |
| GhUBI1 qRT-up   | CTGAATCTTCGCTTTACGTTATC           | qRT-PCR |
| GhUBI1 RT-dn    | GGGATGCAAATCTTCGTGAAAAC           | qRT-PCR |
| GhTCP2 EcoRI-F  | CCGGAATTCATGGAGATAGATGAGATTCAGAC  | Y2H     |
| GhTCP2 BamHI-R  | CGCGGATCCATGGTGGTGATGGTTCTCCACTG  | Y2H     |
| GhTCP7a NdeI-F  | CTTCATATGTCCAATTCAGAGACTGCTGCTAC  | Y2H     |
| GhTCP7a XmaI-R  | CCCCCGGGATGCGGATCCTCGTCTCTTCGAC   | Y2H     |
| GhTCP7b NdeI-F  | CTTCATATGTCAAATTCAGAGGCTGCTGCTAA  | Y2H     |
| GhTCP7b XmaI-R  | CCCCCGGGACGAGGGTCATCGTCTCTTTGAC   | Y2H     |
| GhTCP8 NdeI-F   | CTTCATATGGAACTTACATATTCTCAGAACAAT | Y2H     |
| GhTCP8 XmaI-R   | CCCCCGGGTTGAGAATTATTTGGGTTTTTCATC | Y2H     |
| GhTCP9a NdeI-F  | CTTCATATGGCTGCAATTCATAAACTTGAGGT  | Y2H     |
| GhTCP9a XmaI-R  | CCCCCGGGATGCTTTGAAGATCGAGTCATG    | Y2H     |
| GhTCP9b NdeI-F  | CTTCATATGGATCCTTCTGAAGACGGAGGC    | Y2H     |
| GhTCP9b XmaI-R  | CCCCCGGGTTGCTTAGAAGCAGCTTTTATCTG  | Y2H     |
| GhTCP10 NdeI-F  | CTTCATATGGGAGAAAGCAATCACCAAGCTGC  | Y2H     |
| GhTCP10 XmaI-R  | CCCCCGGGATGGTGAGAGTCAGAGGAAGCAG   | Y2H     |
| GhTCP14a NdeI-F | CTTCATATGGAAGGAGGAGGCAGTGATGATCAT | Y2H     |
| GhTCP14a XmaI-R | CCCCCGGGTTCATCGCCGCCACCTCCACCAC   | Y2H     |
| GhTCP15c NdeI-F | CTTCATATGATCATGGATGAAAATGGGATCCG  | Y2H     |
| GhTCP15c XmaI-R | CCCCCGGGGCTAGTTGAATCATGCCTATTTTC  | Y2H     |
| GhTCP18b NdeI-F | CTTCATATGTATCCTTCAAACAGCAATGGCAG  | Y2H     |
| GhTCP18b XmaI-R | CCCCCGGGAATTTTATTGTTGTAGCCTTCCCA  | Y2H     |
| GhTCP19 NdeI-F  | CTTCATATGGAGTGCAATCGATATCAAACGAT  | Y2H     |
| GhTCP19 XmaI-R  | CCCCCGGGAGGTTTGAACATGGGGCTTGC     | Y2H     |
| GhTCP22 NdeI-F  | CTTCATATGGAACTTACAGATTTGCAAAGCAAT | Y2H     |
| GhTCP22 XmaI-R  | CCCCCGGGTTGAGAAGTATTAGGGTCTTGGTC  | Y2H     |
| GhSLR1 NdeI-F   | CTTCATATGGACGACGAGTTATTAGCTGTT    | Y2H     |
| GhSLR1 XmaI-R   | CCCCCGGGACTCAGCTCCTGAGTTAACTC     | Y2H     |
| GhPIF3 EcoRI-F  | CCGGAATTCATGCCTCTATCCGAGCCATATC   | Y2H     |

|                  |                                   |     |
|------------------|-----------------------------------|-----|
| GhPIF3 BamHI-R   | CGCGGATCCTCACCTATCAGGTAACCTTCTT   | Y2H |
| GhARF6 NdeI-F    | CGCCATATGAGGCTTTCTTCAGCTGGT       | Y2H |
| GhARF6 XmaI-R    | CCCCCGGGTTCAGTAGTCCAATGACCCAC     | Y2H |
| GhBZR1 EcoRI-F   | CTTGAATTCATGACGTCAGATGGGGCGAC     | Y2H |
| GhBZR1 BamHI-R   | CTTGGATCCTCAACATCGAGCTTTCCCAC     | Y2H |
| GhEIN3 BamHI-F   | CTTGGATCCACATGATGATGTTTCGATGAGATG | Y2H |
| GhEIN3 XhoI-R    | CTTCTCGAGTCAAACCAGATTGAAACATCCTG  | Y2H |
| GhMYC2 NdeI-F    | CCGCATATGacggactatcagttagcac      | Y2H |
| GhMYC2 XmaI-R    | CCCCCGGGTcttgcatctccaagttgggtg    | Y2H |
| GhDEL65 BamHI-F  | CTTGGATCCACATGTCTACTGGAGTTCAACATC | Y2H |
| GhDEL65 XhoI-R   | CTTCTCGAGTCAACACTTGCTAGCAATTCTT   | Y2H |
| GhMYB2 NdeI-F    | CTTCATATGatggctccaagaaggctggag    | Y2H |
| GhMYB2 XhoI-R    | CTTCTCGAGTtataaccattgctaatggatcct | Y2H |
| GhMYB23 NdeI-F   | CTTCATATGGAAGAAAAGAGTGAATATAA     | Y2H |
| GhMYB23 SacI-R   | CTTGAGCTCTTAGGCAAAGCCATGCCAAAC    | Y2H |
| GhMYB25 NdeI-F   | CTTCATATGatggggagatcaccatgttg     | Y2H |
| GhMYB25 BamHI-R  | CTTGGATCCtcataaaccattaaatccaaac   | Y2H |
| GhMYB25L NdeI-F  | CTTCATATGatgcagcagctccatgtagcg    | Y2H |
| GhMYB25L BamHI-R | CTTGGATCCtcaaaagacagaagaaccagatg  | Y2H |
| GhTTG1 NdeI-F    | CTTCATATGatggagaattcaactcaagaatcc | Y2H |
| GhTTG1 BamHI-R   | CTTGGATCCtcaaactttgagaagctgcaatt  | Y2H |

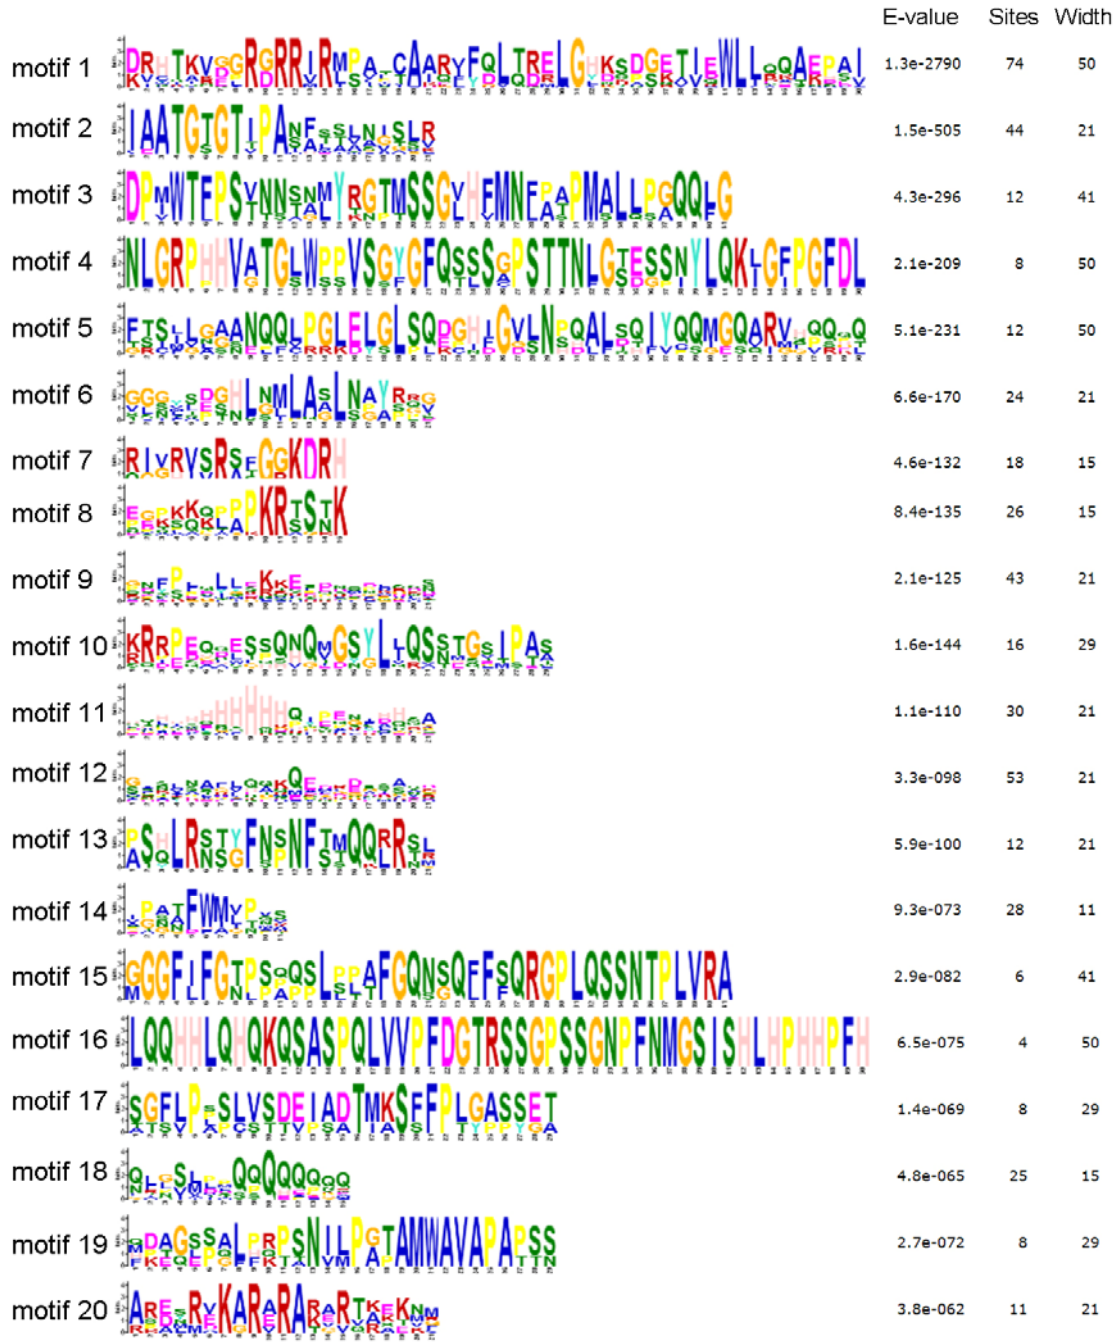

13

14 Supplementary Figure 1. Sequence logo of the motifs of GhTCPs.



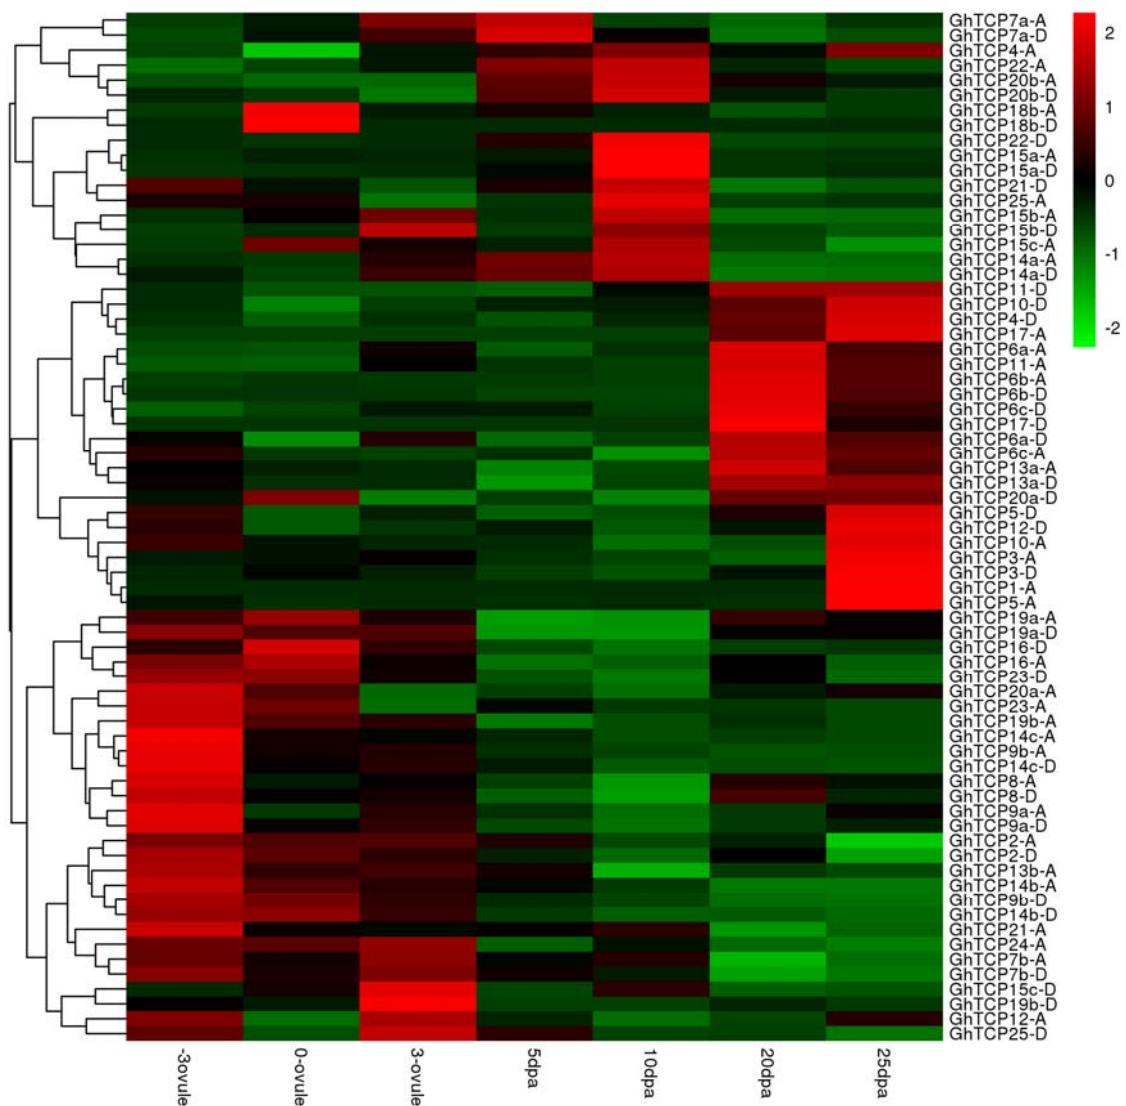

15

16 Supplementary Figure 2. Expression heat map of cotton *TCP* genes during cotton fiber

17 development. Expression values are log<sub>2</sub>-transformed

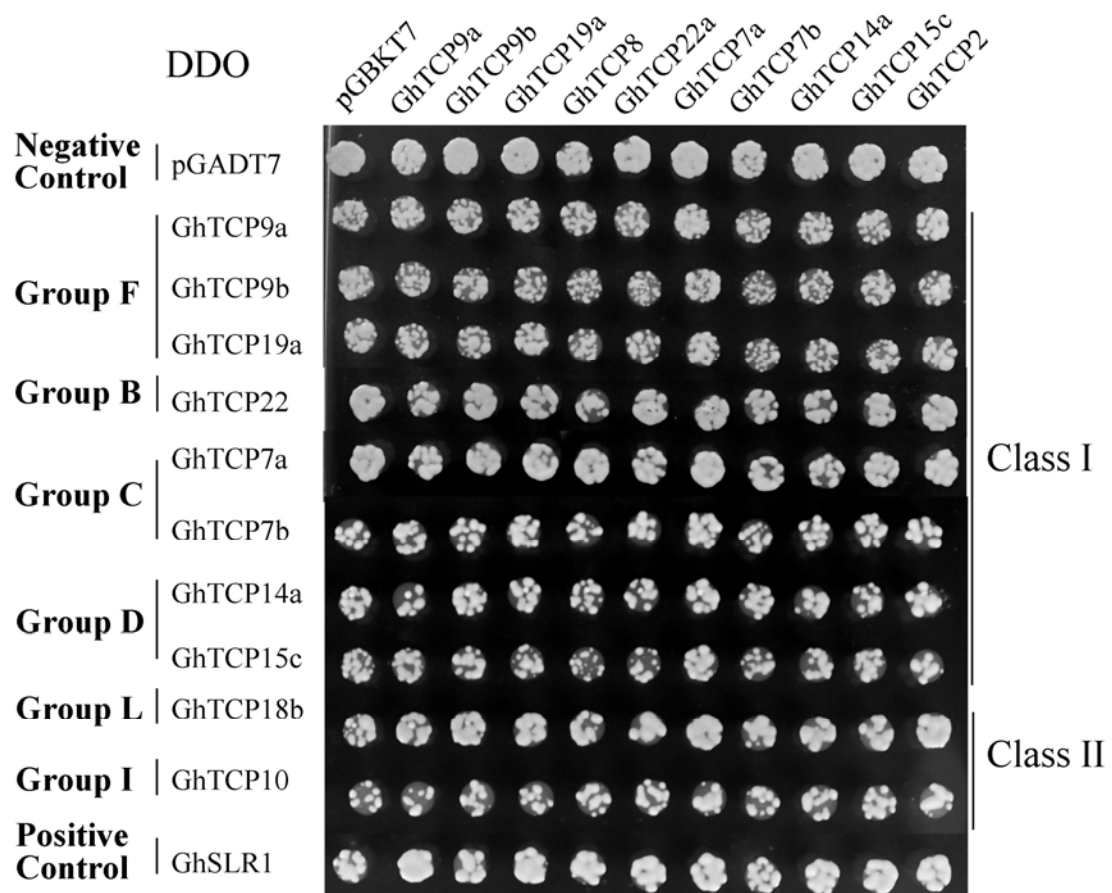

18

19 Supplementary Figure 3. Interaction among GhTCs in yeast cells grown on DDO

20 medium.

21

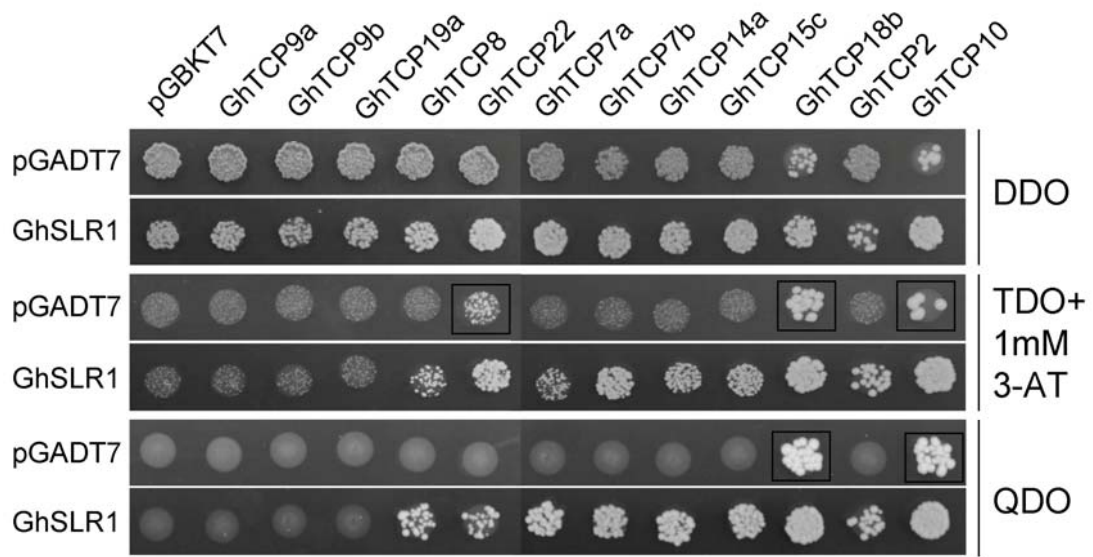

22

23 Supplementary Figure 4. Transcriptional autoactivation analysis of GhTCPs in yeast  
24 cells.

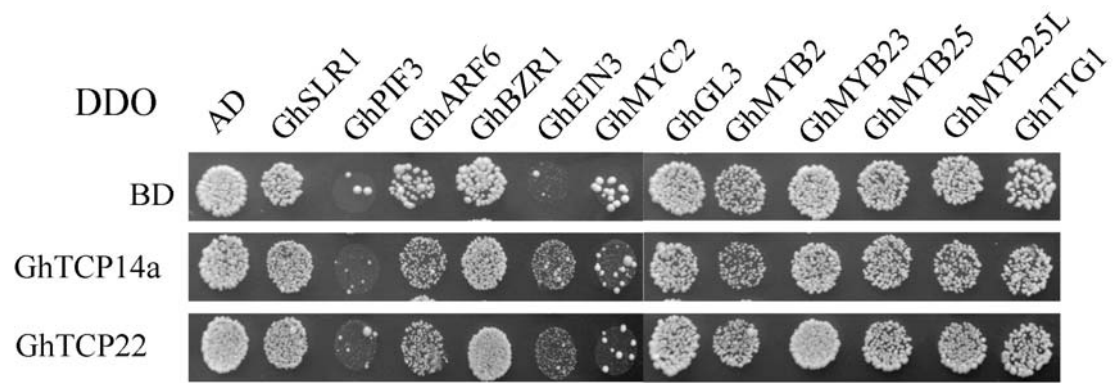

25

26 Supplementary Figure 5. Interaction between GhTCPs and some TFs related to cotton

27 fiber development in yeast cells grown on DDO medium.
